# Supplementary material
Source: Springer Nature journal article supplement (https://www.springermedizin.de/resource/supplementary/12914_2013_319_MOESM5_ESM.pdf/9537212)

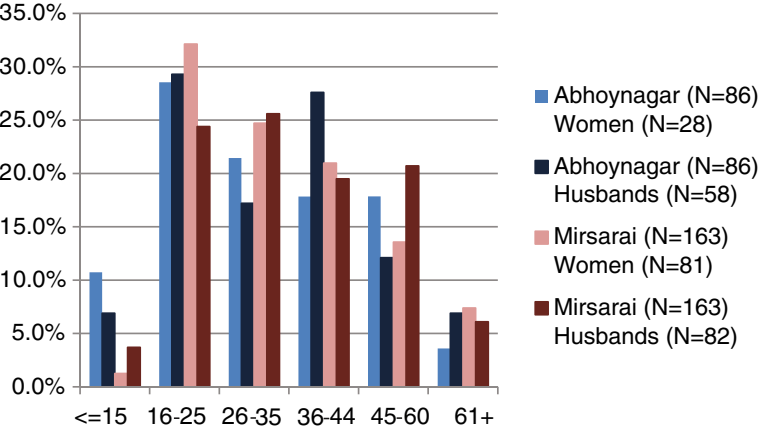

Supplement: MOESM5 [file 9537212]
